# Supplementary material
Source: PubMed Central journal article supplement (PMC3126452)

## **Supplementary Figures**

**Title: Assessing and improving methods used in OTU-based approaches for 16S rRNA gene sequence analysis**

**Authors: Patrick D. Schloss & Sarah L. Westcott**

**Figure S1.** The cumulative fraction of taxa that had a specified maximum intra-taxon distance (A) and total branch length (B) for each taxonomic level when analyzing V13 sequences. At each taxonomic level, sequences that did not affiliate with a known lineage (i.e. incertae sedis) were excluded. The numbers in parentheses next to the name of each taxonomic level indicate the number of taxa within that level that we observed.

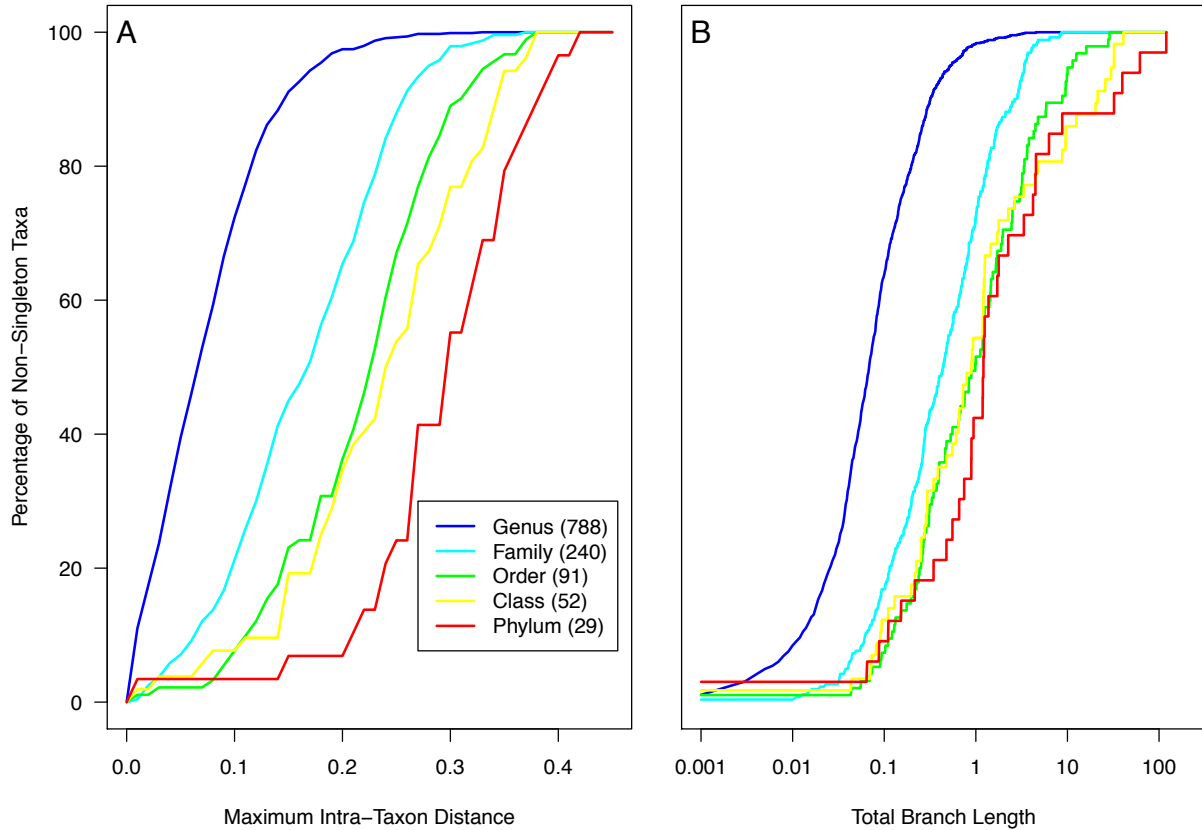

**Figure S2.** The cumulative fraction of taxa that had a specified maximum intra-taxon distance (A) and total branch length (B) for each taxonomic level when analyzing V35 sequences. At each taxonomic level, sequences that did not affiliate with a known lineage (i.e. incertae sedis) were excluded. The numbers in parentheses next to the name of each taxonomic level indicate the number of taxa within that level that we observed.

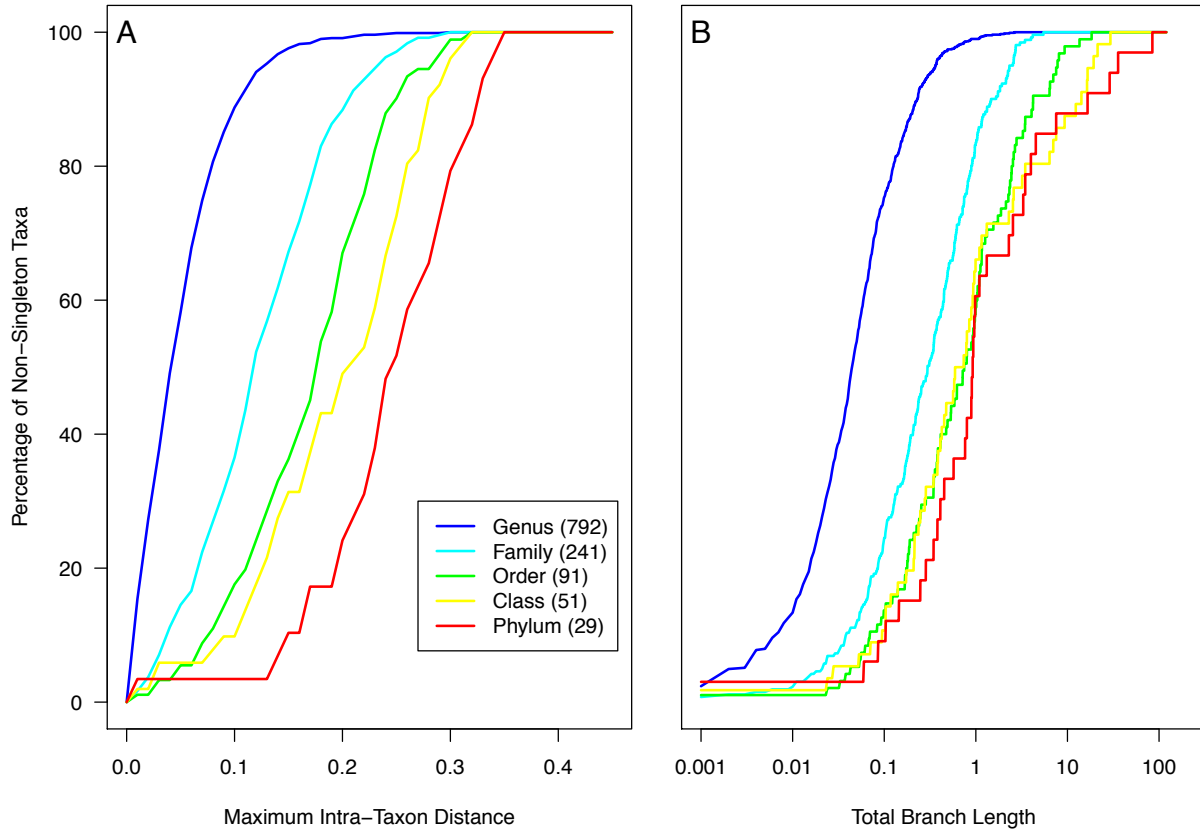

**Figure S3.** The variation in the Matthew's correlation coefficient calculated for OTUs identified using eight classification algorithms at genetic distances varying between 0.00 and 0.10 for V13 sequences.

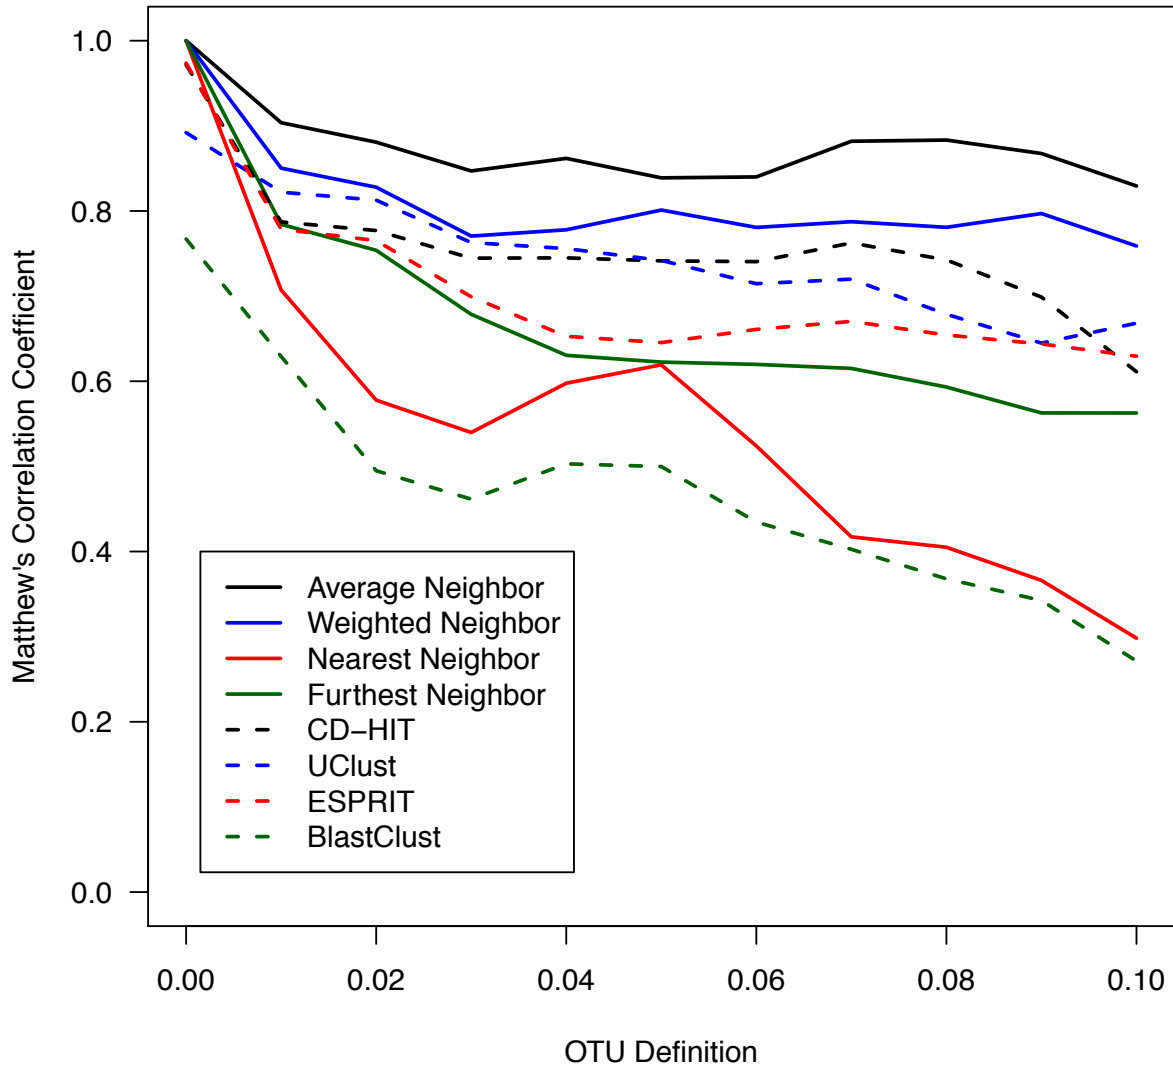

**Figure S4.** The variation in the Matthew's correlation coefficient calculated for OTUs identified using eight classification algorithms at genetic distances varying between 0.00 and 0.10 for V35 sequences.

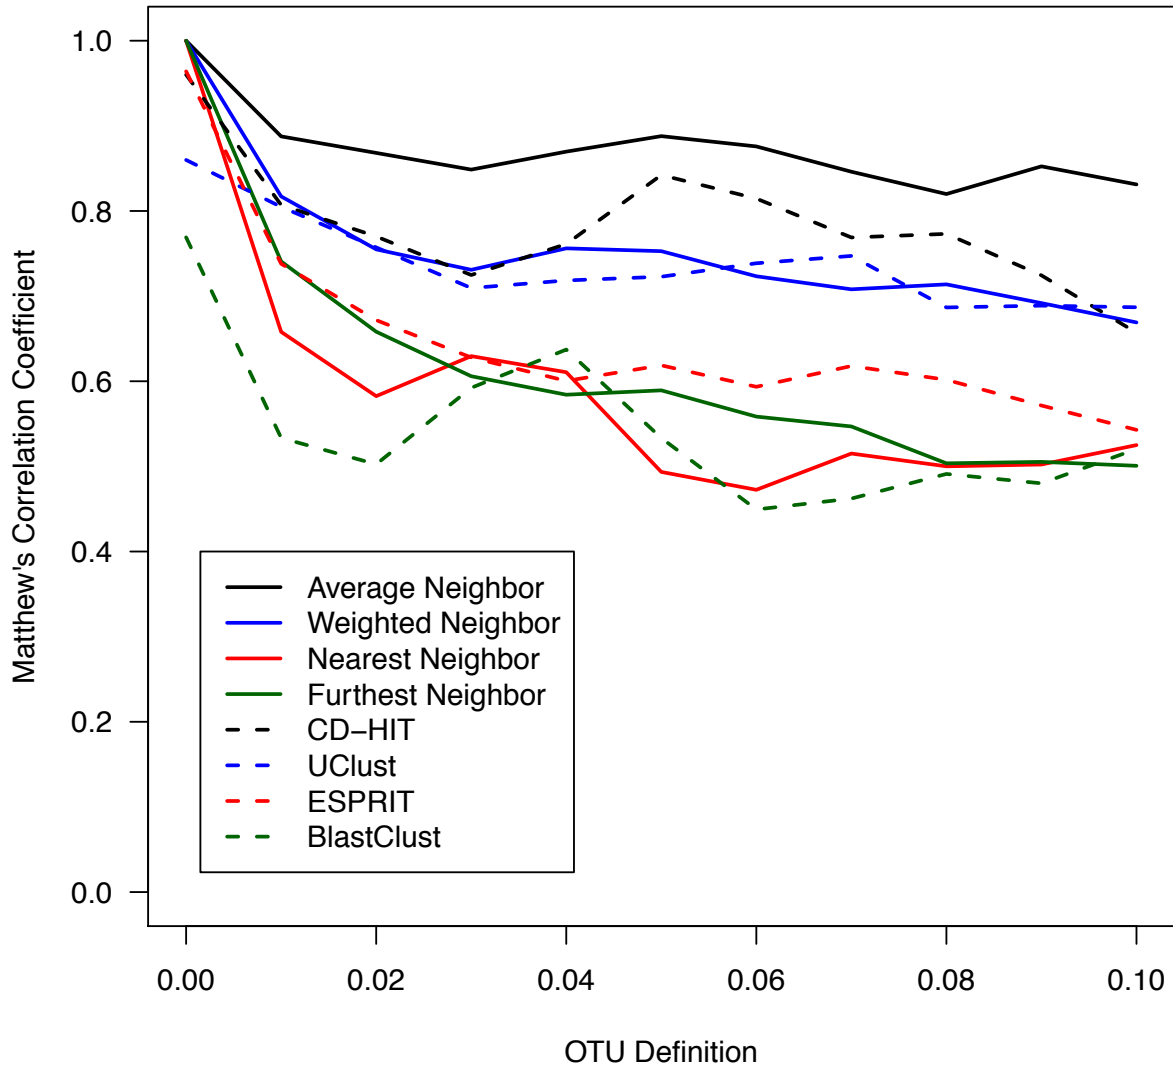

**Figure S5. Comparison of the Matthew's correlation coefficients for OTUs calculated from a threshold of 0.00 to 0.10 when using the phylotype-OTU heuristic for V13 sequences.** For each region, cutoff, and taxonomic level used to split the sequences, the correlation coefficients overlapped with each other except for the family and genus taxonomic levels.

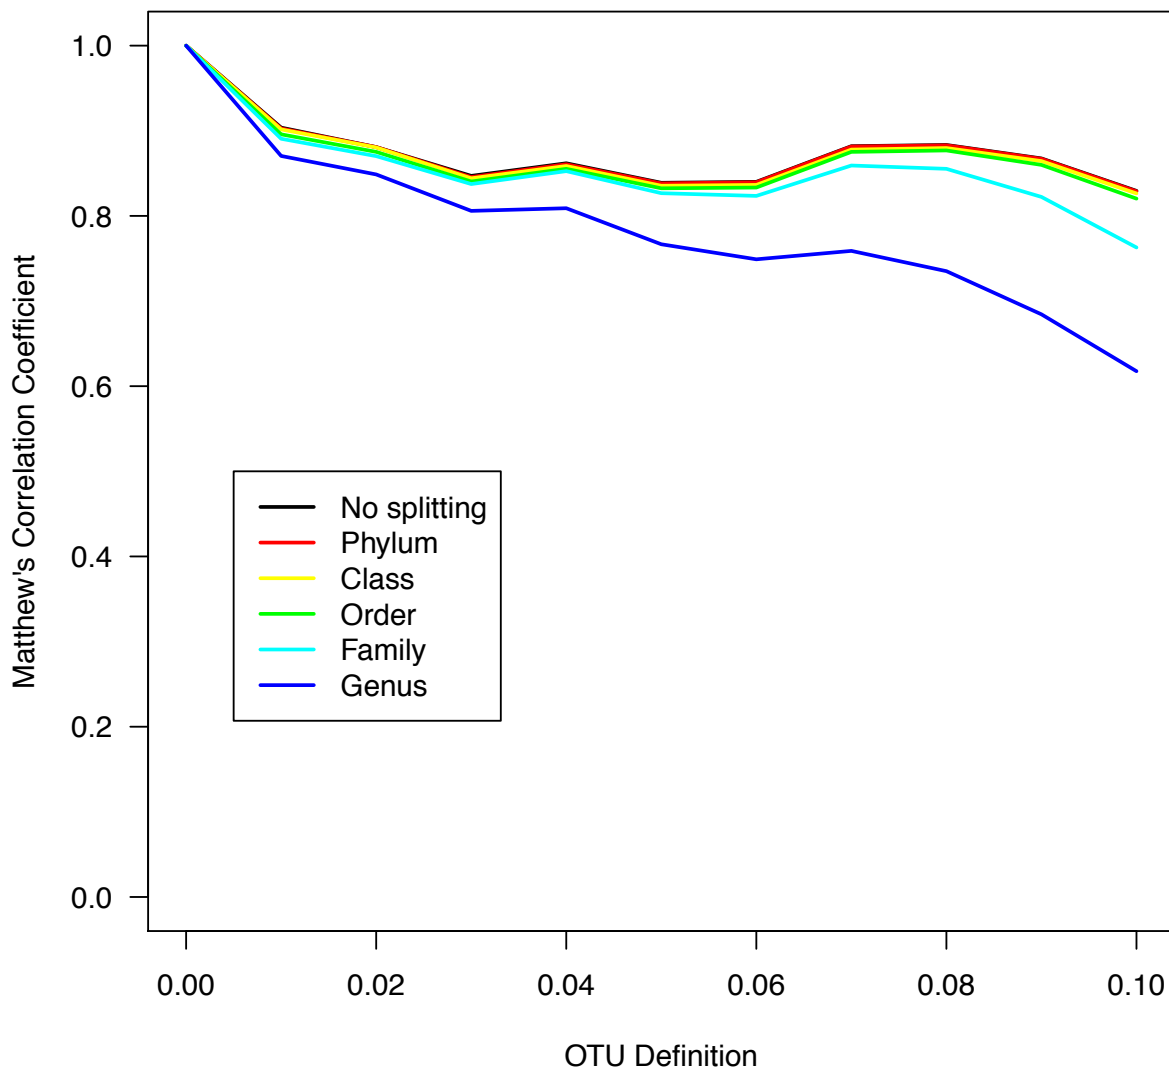

**Figure S6. Comparison of the Matthew's correlation coefficients for OTUs calculated from a threshold of 0.00 to 0.10 when using the phylotype-OTU heuristic for V35 sequences.** For each region, cutoff, and taxonomic level used to split the sequences, the correlation coefficients overlapped with each other except for the family and genus taxonomic levels.

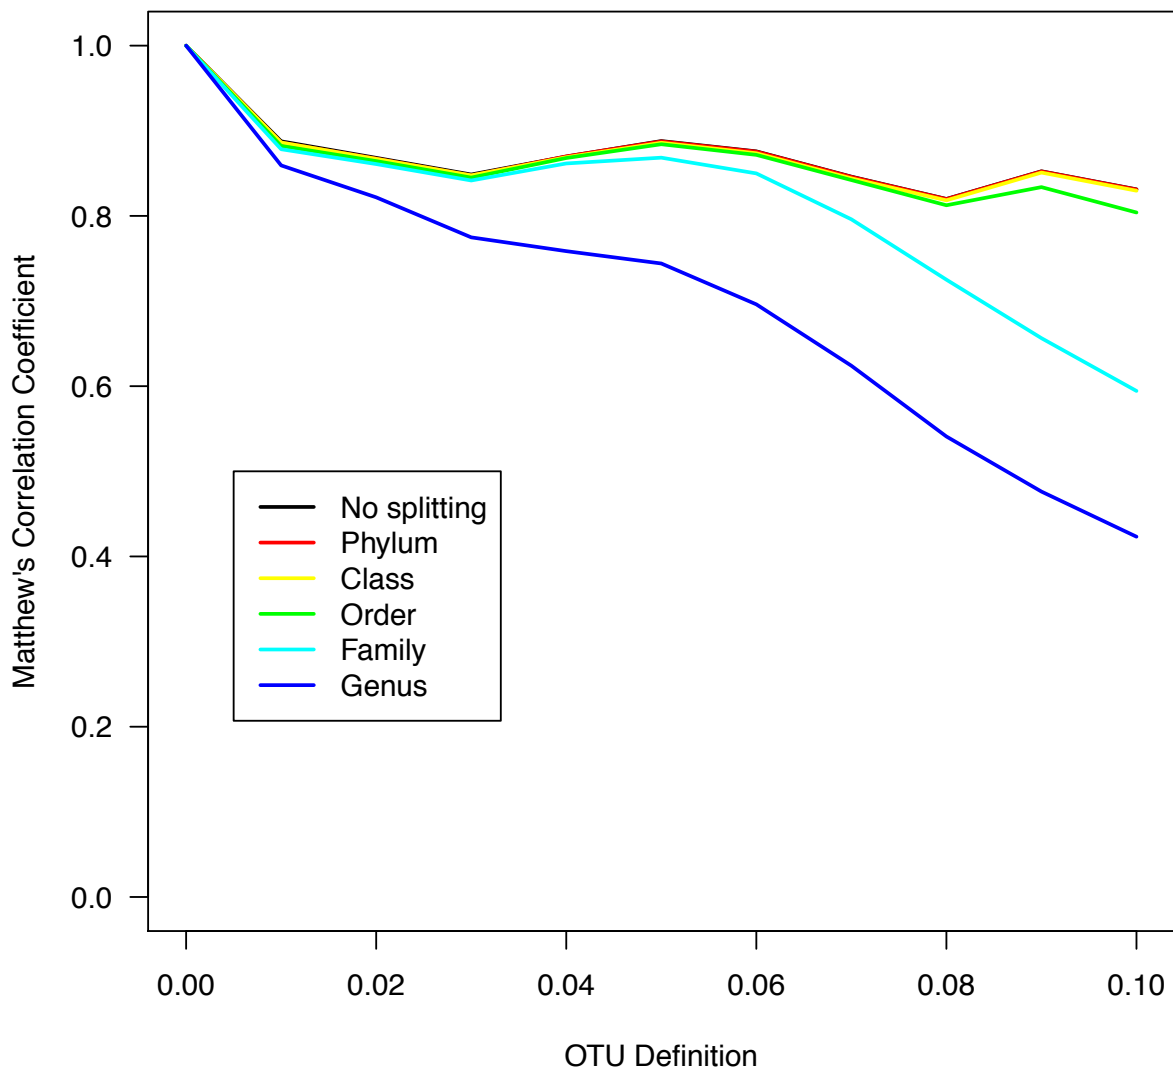

Supplement: supp_77_10_3219__1.pdf [file supp_77_10_3219__1.pdf]
